# Supplementary material for: sp3-Bonded silicon allotropes based on the Kelvin problem
Source: Royal Society of Chemistry journal article supplement (doi:10.1039/c3cp50946j), 2013-01-01
Supplement: c3cp50946j.pdf [file c3cp50946j.pdf]

## $sp^3$ -bonded silicon allotropes based on the Kelvin problem

Hui-Yan Zhao,<sup>1,2</sup> Jing Wang,<sup>1,2</sup> Qing-Min Ma,<sup>1,2</sup> and Ying Liu<sup>1,2,\*</sup>

<sup>1</sup>Department of Physics and Hebei Advanced Thin Film Laboratory, Hebei Normal University,

Shijiazhuang 050024, Hebei, China

<sup>2</sup>National Key Laboratory for Materials Simulation and Design, Beijing 100083, China.

### 1. Structural information for Kelvin Silicons

Table S1 Crystallographic data for Kelvin Silicons at 0 GPa.

| $K^I$ Space group $Im\bar{3}m$ $a = b = c = 6.7348 \text{ \AA}$                                               |     |         |         |         |
|---------------------------------------------------------------------------------------------------------------|-----|---------|---------|---------|
| Atomic coordinates                                                                                            |     |         |         |         |
| Si                                                                                                            | 12d | 0.25000 | 0.00000 | 0.50000 |
| $K^{II}$ Space group $Pm\bar{3}n$ $a = b = c = 10.2350 \text{ \AA}$                                           |     |         |         |         |
| Atomic coordinates                                                                                            |     |         |         |         |
| Si1                                                                                                           | 16i | 0.18370 | 0.18370 | 0.18370 |
| Si2                                                                                                           | 24k | 0.50000 | 0.80767 | 0.61714 |
| Si3                                                                                                           | 6d  | 0.25000 | 0.50000 | 0.00000 |
| $K^{III}$ Space group $C2/c$ $a = 25.4751 \text{ \AA}$ , $b = 15.2199 \text{ \AA}$ , $c = 9.8931 \text{ \AA}$ |     |         |         |         |
| Atomic coordinates                                                                                            |     |         |         |         |
| Si1                                                                                                           | 8f  | 0.05400 | 0.59918 | 0.60088 |
| Si2                                                                                                           | 8f  | 0.13876 | 0.53982 | 0.60624 |
| Si3                                                                                                           | 8f  | 0.13356 | 0.40954 | 0.73362 |
| Si4                                                                                                           | 8f  | 0.16893 | 0.28447 | 0.61924 |
| Si5                                                                                                           | 8f  | 0.94914 | 0.39437 | 0.64040 |
| Si6                                                                                                           | 8f  | 0.06563 | 0.11076 | 0.49278 |
| Si7                                                                                                           | 8f  | 0.10566 | 0.17538 | 0.67808 |
| Si8                                                                                                           | 8f  | 0.97505 | 0.15188 | 0.49502 |
| Si9                                                                                                           | 8f  | 0.03689 | 0.24295 | 0.81261 |
| Si10                                                                                                          | 8f  | 0.73340 | 0.38206 | 0.59602 |
| Si11                                                                                                          | 8f  | 0.81136 | 0.46341 | 0.60383 |
| Si12                                                                                                          | 8f  | 0.19369 | 0.59274 | 0.76670 |
| Si13                                                                                                          | 8f  | 0.17645 | 0.72646 | 0.87847 |
| Si14                                                                                                          | 8f  | 0.75572 | 0.26910 | 0.75327 |
| Si15                                                                                                          | 8f  | 0.27309 | 0.63291 | 0.64193 |
| Si16                                                                                                          | 8f  | 0.04053 | 0.74752 | 0.68228 |
| Si17                                                                                                          | 8f  | 0.10809 | 0.81609 | 0.80305 |
| Si18                                                                                                          | 8f  | 0.59132 | 0.45966 | 0.49777 |
| Si19                                                                                                          | 8f  | 0.64846 | 0.43387 | 0.67450 |
| Si20                                                                                                          | 8f  | 0.64715 | 0.56654 | 0.80097 |
| Si21                                                                                                          | 4e  | 0.00000 | 0.50187 | 0.75000 |

| $K^{IV}$ Space group $I\bar{4}3m$ $a = b = c = 12.4874 \text{ \AA}$ |     |         |         |         |
|---------------------------------------------------------------------|-----|---------|---------|---------|
| Atomic coordinates                                                  |     |         |         |         |
| Si1                                                                 | 48h | 0.63106 | 0.76376 | 0.02279 |
| Si2                                                                 | 8c  | 0.39135 | 0.60865 | 0.39135 |
| Si3                                                                 | 2a  | 0.00000 | 0.00000 | 0.00000 |
| Si4                                                                 | 24g | 0.70878 | 0.93204 | 0.06796 |

  

| $K^V$ Space group $Cmmm$ $a = 17.6979 \text{ \AA}$ , $b = 10.2316 \text{ \AA}$ $c = 10.3782 \text{ \AA}$ |     |         |         |         |
|----------------------------------------------------------------------------------------------------------|-----|---------|---------|---------|
| Atomic coordinates                                                                                       |     |         |         |         |
| Si1                                                                                                      | 16r | 0.10476 | 0.81429 | 0.68774 |
| Si2                                                                                                      | 16r | 0.80974 | 0.69027 | 0.81308 |
| Si3                                                                                                      | 8n  | 0.00000 | 0.88065 | 0.81309 |
| Si4                                                                                                      | 4h  | 0.86770 | 0.50000 | 0.50000 |
| Si5                                                                                                      | 8o  | 0.79075 | 0.50000 | 0.68778 |
| Si6                                                                                                      | 8o  | 0.66677 | 0.50000 | 0.61237 |
| Si7                                                                                                      | 8q  | 0.06628 | 0.69894 | 0.50000 |
| Si8                                                                                                      | 4i  | 0.00000 | 0.74243 | 0.00000 |
| Si9                                                                                                      | 8p  | 0.87888 | 0.62114 | 0.00000 |

  

| $K^{VI}$ Space group $Fd\bar{3}m$ $a = b = c = 25.9753 \text{ \AA}$ |      |         |         |         |
|---------------------------------------------------------------------|------|---------|---------|---------|
| Atomic coordinates                                                  |      |         |         |         |
| Si1                                                                 | 192i | 0.82200 | 0.38630 | 0.50908 |
| Si2                                                                 | 192i | 0.81466 | 0.74944 | 0.62069 |
| Si3                                                                 | 192i | 0.30632 | 0.49257 | 0.37073 |
| Si4                                                                 | 192i | 0.85952 | 0.53257 | 0.46743 |
| Si5                                                                 | 96g  | 0.30267 | 0.30267 | 0.19733 |
| Si6                                                                 | 32e  | 0.25000 | 0.25000 | 0.25000 |

  

| $K^{VII}$ Space group $P6_3/mmc$ $a = b = 10.4154 \text{ \AA}$ , $c = 17.0590 \text{ \AA}$ |     |         |         |         |
|--------------------------------------------------------------------------------------------|-----|---------|---------|---------|
| Atomic coordinates                                                                         |     |         |         |         |
| Si1                                                                                        | 24l | 0.04984 | 0.33042 | 0.06454 |
| Si2                                                                                        | 12k | 0.08433 | 0.54216 | 0.36473 |
| Si3                                                                                        | 12k | 0.12352 | 0.87648 | 0.86128 |
| Si4                                                                                        | 4f  | 0.33333 | 0.66667 | 0.31962 |
| Si5                                                                                        | 4e  | 0.00000 | 0.00000 | 0.31818 |
| Si6                                                                                        | 6h  | 0.06939 | 0.53469 | 0.75000 |
| Si7                                                                                        | 6h  | 0.20224 | 0.79776 | 0.75000 |

  

| $K^{VIII}$ Space group $P\bar{3}m1$ $a = b = 10.0979 \text{ \AA}$ , $c = 16.0108 \text{ \AA}$ |     |         |         |         |
|-----------------------------------------------------------------------------------------------|-----|---------|---------|---------|
| Atomic coordinates                                                                            |     |         |         |         |
| Si1                                                                                           | 12j | 0.00116 | 0.38093 | 0.29528 |
| Si2                                                                                           | 12j | 0.75683 | 0.00078 | 0.17352 |
| Si3                                                                                           | 12j | 0.91169 | 0.33349 | 0.05811 |
| Si4                                                                                           | 6i  | 0.86691 | 0.13309 | 0.49945 |
| Si5                                                                                           | 6i  | 0.79104 | 0.20896 | 0.62182 |
| Si6                                                                                           | 6i  | 0.79117 | 0.20883 | 0.37672 |
| Si7                                                                                           | 2d  | 0.66667 | 0.33333 | 0.42649 |
| Si8                                                                                           | 2d  | 0.66667 | 0.33333 | 0.57190 |

  

| $K^{IX}$ Space group $Cmcm$ $a = 16.7904 \text{ \AA}$ , $b = 12.9014 \text{ \AA}$ , $c = 10.0253 \text{ \AA}$ |  |  |  |  |
|---------------------------------------------------------------------------------------------------------------|--|--|--|--|
|---------------------------------------------------------------------------------------------------------------|--|--|--|--|

| Atomic coordinates                                                                     |     |         |         |         |
|----------------------------------------------------------------------------------------|-----|---------|---------|---------|
| Si1                                                                                    | 16h | 0.38084 | 0.71275 | 0.44098 |
| Si2                                                                                    | 16h | 0.32399 | 0.87541 | 0.37336 |
| Si3                                                                                    | 16h | 0.19229 | 0.91851 | 0.44092 |
| Si4                                                                                    | 8e  | 0.39901 | 0.00000 | 0.50000 |
| Si5                                                                                    | 8f  | 0.00000 | 0.24825 | 0.56097 |
| Si6                                                                                    | 8f  | 0.00000 | 0.42098 | 0.63107 |
| Si7                                                                                    | 8g  | 0.11579 | 0.04402 | 0.75000 |
| Si8                                                                                    | 8g  | 0.42917 | 0.37152 | 0.75000 |
| Si9                                                                                    | 4c  | 0.00000 | 0.14370 | 0.75000 |
| $K^X$ Space group $P4_2/nmc$ $a = b = 10.2614 \text{ \AA}$ , $c = 24.3468 \text{ \AA}$ |     |         |         |         |
| Atomic coordinates                                                                     |     |         |         |         |
| Si1                                                                                    | 16h | 0.18346 | 0.31598 | 0.47133 |
| Si2                                                                                    | 16h | 0.20578 | 0.12227 | 0.61131 |
| Si3                                                                                    | 16h | 0.32019 | 0.24563 | 0.68328 |
| Si4                                                                                    | 16h | 0.18019 | 0.38278 | 0.73473 |
| Si5                                                                                    | 16h | 0.50000 | 0.31000 | 0.55372 |
| Si6                                                                                    | 16h | 0.50000 | 0.36958 | 0.64783 |
| Si7                                                                                    | 16h | 0.00000 | 0.38028 | 0.52430 |
| Si8                                                                                    | 16h | 0.00000 | 0.23569 | 0.60339 |
| Si9                                                                                    | 16h | 0.00000 | 0.38399 | 0.67690 |
| Si10                                                                                   | 8e  | 0.00000 | 0.00000 | 0.00000 |
| $K^{XI}$ Space group $R\bar{3}$ $a = b = c = 17.6221 \text{ \AA}$                      |     |         |         |         |
| Atomic coordinates                                                                     |     |         |         |         |
| Si1                                                                                    | 24d | 0.34597 | 0.41824 | 0.23752 |
| Si2                                                                                    | 24d | 0.31547 | 0.40412 | 0.60584 |
| Si3                                                                                    | 24d | 0.30775 | 0.40162 | 0.10815 |
| Si4                                                                                    | 24d | 0.30260 | 0.29669 | 0.52667 |
| Si5                                                                                    | 24d | 0.28632 | 0.38982 | 0.73659 |
| Si6                                                                                    | 24d | 0.27115 | 0.51309 | 0.54110 |
| Si7                                                                                    | 24d | 0.26841 | 0.51848 | 0.91664 |
| Si8                                                                                    | 24d | 0.10412 | 0.52669 | 0.41579 |
| Si9                                                                                    | 24d | 0.10644 | 0.43729 | 0.04476 |
| Si10                                                                                   | 8c  | 0.31039 | 0.31039 | 0.31039 |
| Si11                                                                                   | 8c  | 0.26609 | 0.76609 | 0.73391 |

## 2. Electronic band structures for Kelvin Silicons

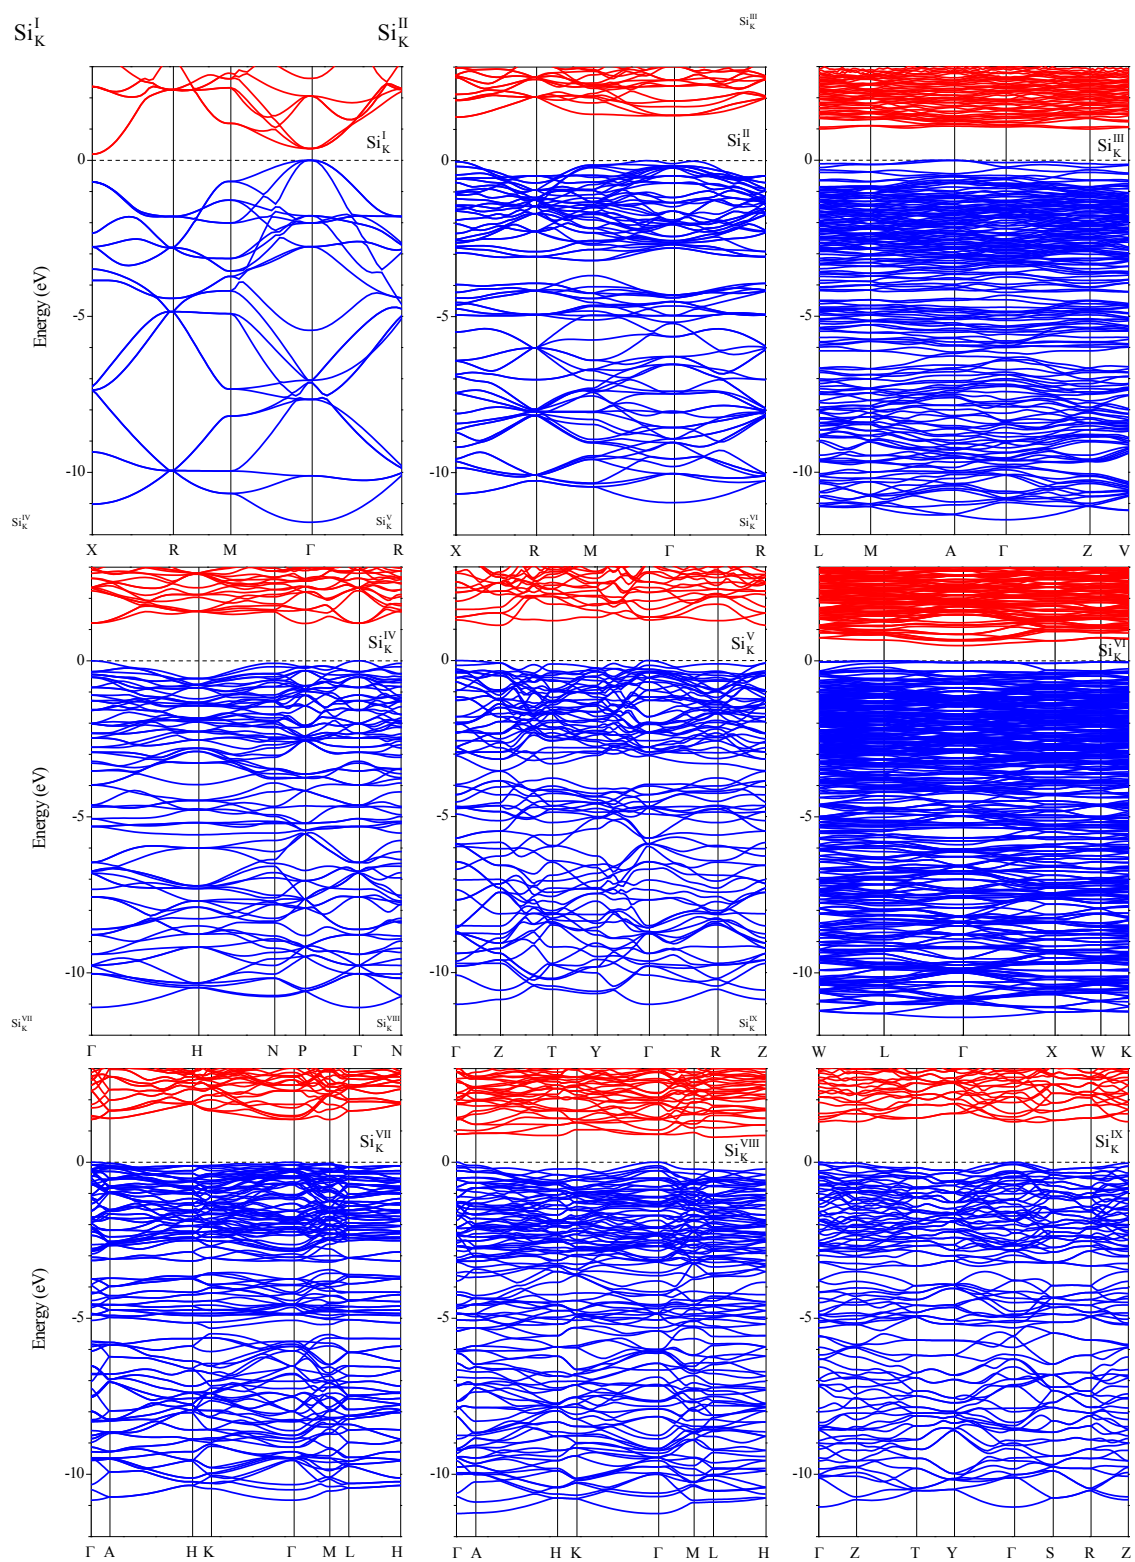

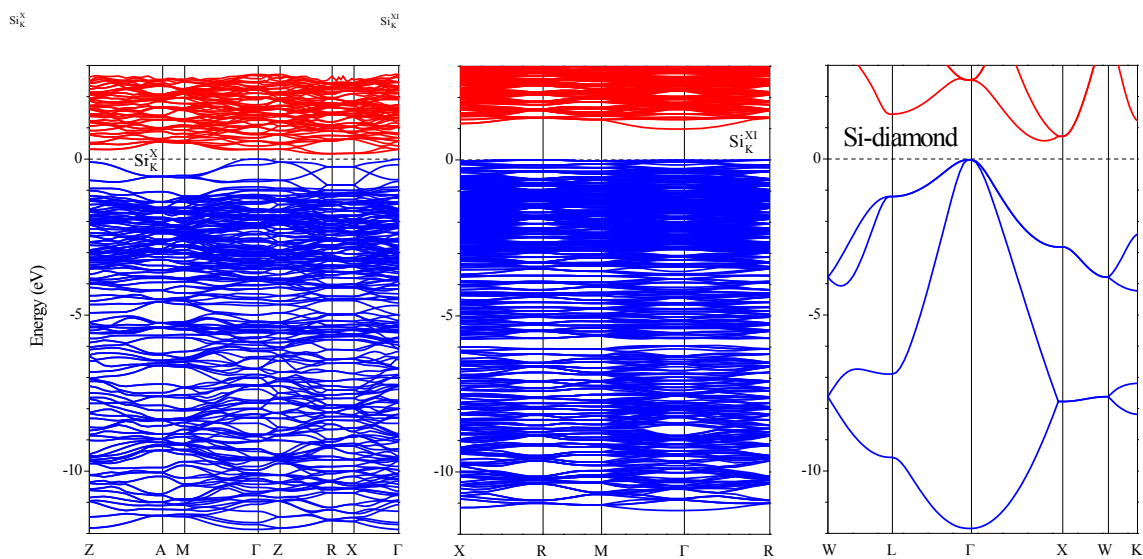

Figure S1 Electronic band structures of Kelvin Silicons and diamond phase of silicon.

### 3. X-ray diffraction spectra for Kelvin Silicons

To provide information and characters for possible experimental observation, the simulated XRD patterns at zero pressures are obtained by the REFLEX program implemented in Materials Studio 5.0 package.<sup>S1</sup>

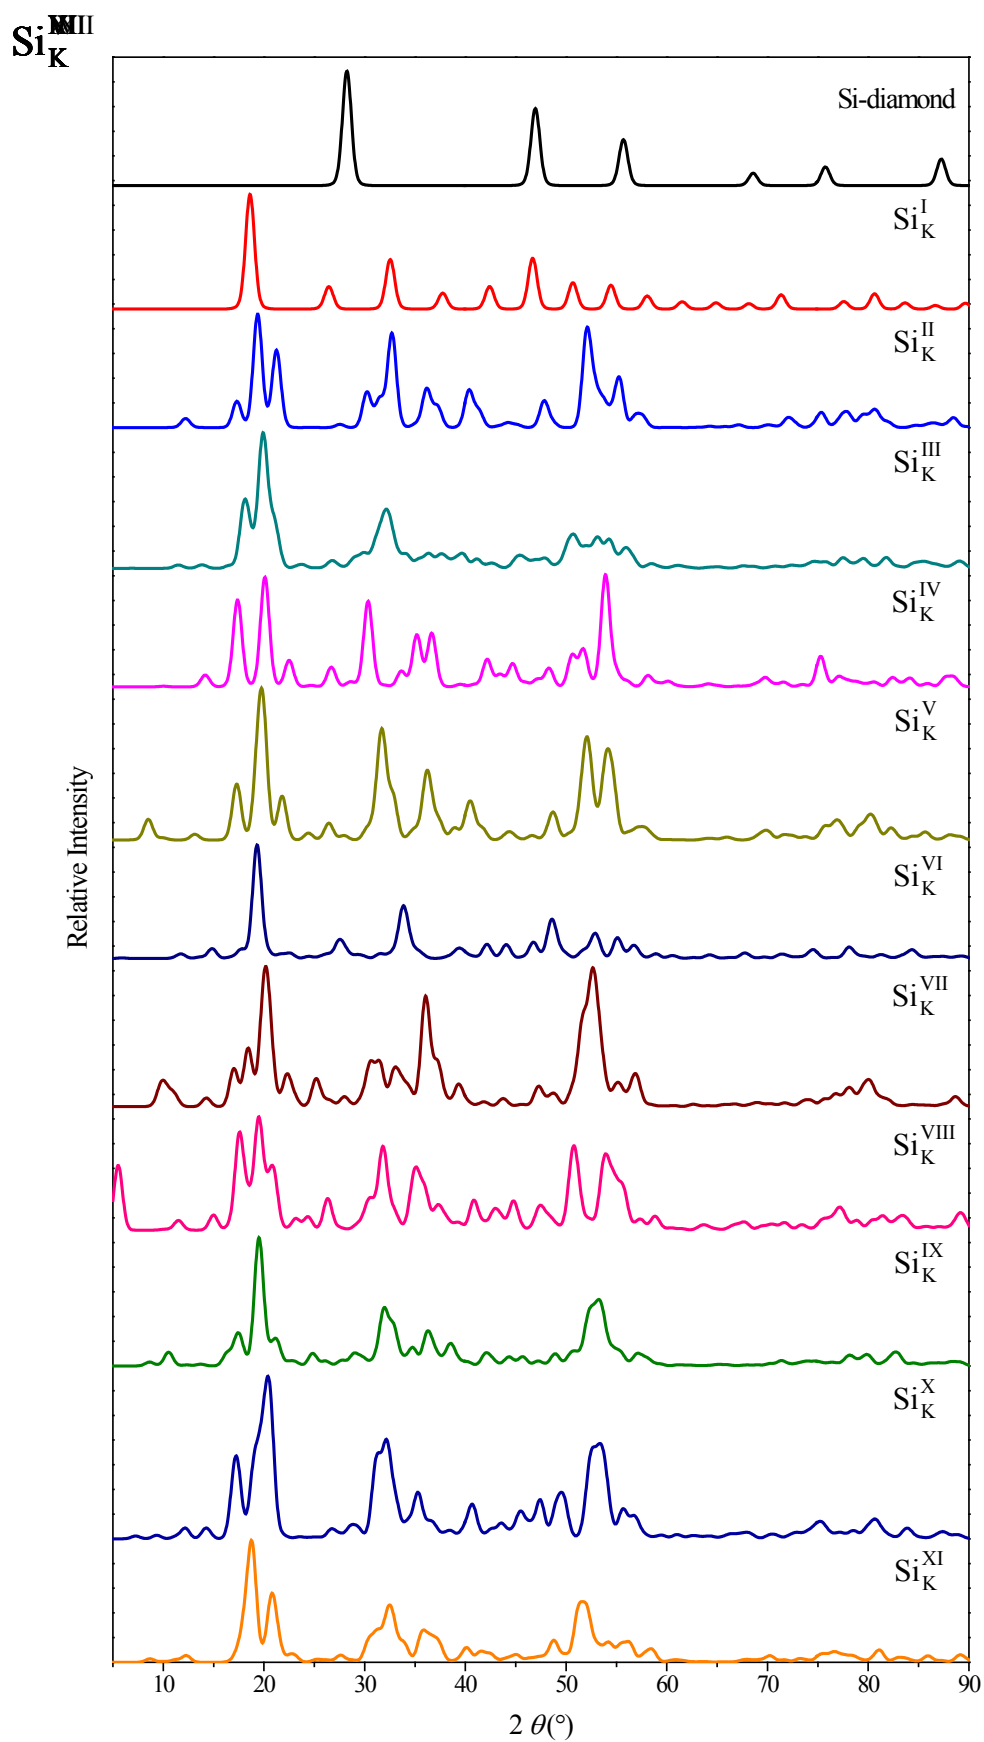

Figure S2 Simulated XRD patterns of diamond silicon and Kelvin Silicons at zero pressure. The X-ray wavelength is 1.5406 Å.

#### 4. The calculated elastic constants for Kelvin Silicons

Table S2 The calculated elastic constants  $C_{ij}$  (GPa) for the Kelvin Silicons at 0 GPa.

|               |          |          |              |          |          |             |          |          |          |          |          |          |
|---------------|----------|----------|--------------|----------|----------|-------------|----------|----------|----------|----------|----------|----------|
| $Si_K^I$      |          |          | $Si_K^{II}$  |          |          |             |          |          |          |          |          |          |
| $C_{11}$      | $C_{44}$ | $C_{12}$ | $C_{11}$     | $C_{44}$ | $C_{12}$ |             |          |          |          |          |          |          |
| 117           | 38       | 43       | 133          | 48       | 48       |             |          |          |          |          |          |          |
| $Si_K^{III}$  |          |          |              |          |          |             |          |          |          |          |          |          |
| $C_{11}$      | $C_{22}$ | $C_{33}$ | $C_{44}$     | $C_{55}$ | $C_{66}$ | $C_{12}$    | $C_{13}$ | $C_{15}$ | $C_{23}$ | $C_{25}$ | $C_{35}$ | $C_{46}$ |
| 133           | 120      | 130      | 43           | 43       | 39       | 47          | 45       | -1       | 49       | 0        | -1       | -1       |
| $Si_K^{IV}$   |          |          |              |          |          | $Si_K^V$    |          |          |          |          |          |          |
| $C_{11}$      | $C_{44}$ | $C_{12}$ | $C_{11}$     | $C_{22}$ | $C_{33}$ | $C_{44}$    | $C_{55}$ | $C_{66}$ | $C_{12}$ | $C_{13}$ | $C_{23}$ |          |
| 132           | 43       | 45       | 135          | 135      | 126      | 48          | 48       | 45       | 44       | 42       | 42       |          |
| $Si_K^{VI}$   |          |          | $Si_K^{VII}$ |          |          |             |          |          |          |          |          |          |
| $C_{11}$      | $C_{44}$ | $C_{12}$ | $C_{11}$     | $C_{33}$ | $C_{44}$ | $C_{12}$    | $C_{13}$ |          |          |          |          |          |
| 123           | 38       | 44       | 137          | 137      | 47       | 45          | 45       |          |          |          |          |          |
| $Si_K^{VIII}$ |          |          |              |          |          |             |          |          |          |          |          |          |
| $C_{11}$      | $C_{33}$ | $C_{44}$ | $C_{12}$     | $C_{13}$ |          |             |          |          |          |          |          |          |
| 122           | 108      | 44       | 39           | 37       |          |             |          |          |          |          |          |          |
| $Si_K^{IX}$   |          |          |              |          |          |             |          |          |          |          |          |          |
| $C_{11}$      | $C_{22}$ | $C_{33}$ | $C_{44}$     | $C_{55}$ | $C_{66}$ | $C_{12}$    | $C_{13}$ | $C_{23}$ |          |          |          |          |
| 132           | 140      | 129      | 47           | 44       | 42       | 44          | 47       | 43       |          |          |          |          |
| $Si_K^X$      |          |          |              |          |          | $Si_K^{XI}$ |          |          |          |          |          |          |
| $C_{11}$      | $C_{33}$ | $C_{44}$ | $C_{66}$     | $C_{12}$ | $C_{13}$ | $C_{11}$    | $C_{44}$ | $C_{12}$ |          |          |          |          |
| 109           | 116      | 36       | 36           | 38       | 35       | 132         | 41       | 45       |          |          |          |          |

The mechanical stability of these Kelvin-Silicon structures studied in this work was also examined by calculations of the elastic constants using the CASTEP program implemented in Materials Studio 5.0 package.<sup>S1</sup> The corresponding values of the elastic constants for the Kelvin Silicons at 0 GPa were listed in Table S2. From Table S2, both structures are mechanically stable since their elastic constants satisfy the elastic stability criteria,<sup>S2</sup> i.e., the strain energy must be positive against any homogeneous elastic deformation. Remarkably, several elastic constants  $C_{15}$ ,  $C_{35}$ , and  $C_{46}$  of the monoclinic  $Si_K^{III}$  are negative, while other Kelvin-Silicon structures have

no negative elastic constants. Based on the arguments given by Söderlind and Klepeis,<sup>S3</sup> these negative values do not mean an instability because the actual applied distortions all yield positive elastic coefficients.

**References:**

- S1. M. Segall, P. Lindan, M. Probert, C. Pickard, P. Hasnip, S. Clark, and J. Payne, *J. Phys.: Condens. Matter*, 2002, **14**, 2717.
- S2. J. F. Nye, Oxford University Press, Oxford, 1985.
- S3. P. Söderlind, and J. E. Klepeis, *Phys. Rev. B*, 2009, **79**, 104110.
